# Supplementary material for: The Effect of Lung Resection for NSCLC on Circulating Immune Cells: A Pilot Study
Source: MDPI journal article supplement (doi:10.3390/curroncol30050387), 2023-05-17
Supplement: s1 [file s1]

**Supplemental Table S1. Flow Cytometry Staining Panels****Leukocyte panel:**

| <b>Antibody</b> | <b>Fluor</b> | <b>ZE5 filter</b> | <b>Supplier</b> | <b>Catalog #</b> | <b>Clone</b> | <b>Titer</b> |
|-----------------|--------------|-------------------|-----------------|------------------|--------------|--------------|
| CD16            | BV421        | V420              | BioLegend       | 302038           | 3G8          | 1:31         |
| CD45            | BV510        | V525              | BioLegend       | 304036           | HI30         | 1:80         |
| CD4             | FITC         | B525              | BioLegend       | 317408           | OKT4         | 1:320        |
| CD56            | PE           | Y577              | Miltenyi Biotec | 170-081-014      | REA196       | 1:40         |
| CD8             | PerCP-Cy5.5  | B720              | BioLegend       | 300924           | HIT8a        | 1:320        |
| CD19            | PE-Cy7       | B750LP            | BioLegend       | 302216           | HIB19        | 1:320        |
| CD14            | APC          | R670              | BioLegend       | 325608           | HCD14        | 1:20         |
| CD3             | APC-Cy7      | R775              | BioLegend       | 300318           | HIT3a        | 1:320        |

**Treg panel:**

| <b>Antibody</b>              | <b>Fluor</b> | <b>ZE5 filter</b> | <b>Supplier</b> | <b>Catalog #</b> | <b>Clone</b> | <b>Titer</b> |
|------------------------------|--------------|-------------------|-----------------|------------------|--------------|--------------|
| <b>Cell surface markers</b>  |              |                   |                 |                  |              |              |
| CD45                         | BUV395       | UV387             | BD Biosciences  | 563792           | HI30         | 1:160        |
| CD3                          | APC-Fire750  | R775              | BioLegend       | 344840           | SK7          | 1:160        |
| CD4                          | BUV661       | UV670             | BD Biosciences  | 566003           | SK3          | 1:80         |
| CD45RA                       | BV711        | V720              | BioLegend       | 304138           | HI100        | 1:40         |
| PD-1                         | PE-Cy7       | B750LP            | BioLegend       | 329918           | EH12.2H7     | 1:80         |
| CD25                         | PE-Dazzle594 | Y615              | BioLegend       | 356126           | M-A251       | 1:80         |
| CD146                        | BV510        | V525              | BD Biosciences  | 563255           | P1H12        | 1:20         |
| <b>Intracellular markers</b> |              |                   |                 |                  |              |              |
| IL-17A                       | BV421        | V420              | BD Biosciences  | 562933           | N49-653      | 1:40         |
| IL-10                        | PE           | Y577              | Miltenyi Biotec | 130-121-126      | JES3-9D7     | 1:50         |
| CTLA4                        | BV605        | V615              | BioLegend       | 369610           | BN13         | 1:40         |
| FoxP3                        | FITC         | B525              | Thermo Fisher   | 11-4776-42       | PCH101       | 1:40         |
| RORgt                        | AF647        | R670              | BD Biosciences  | 563620           | Q21-559      | 1:40         |

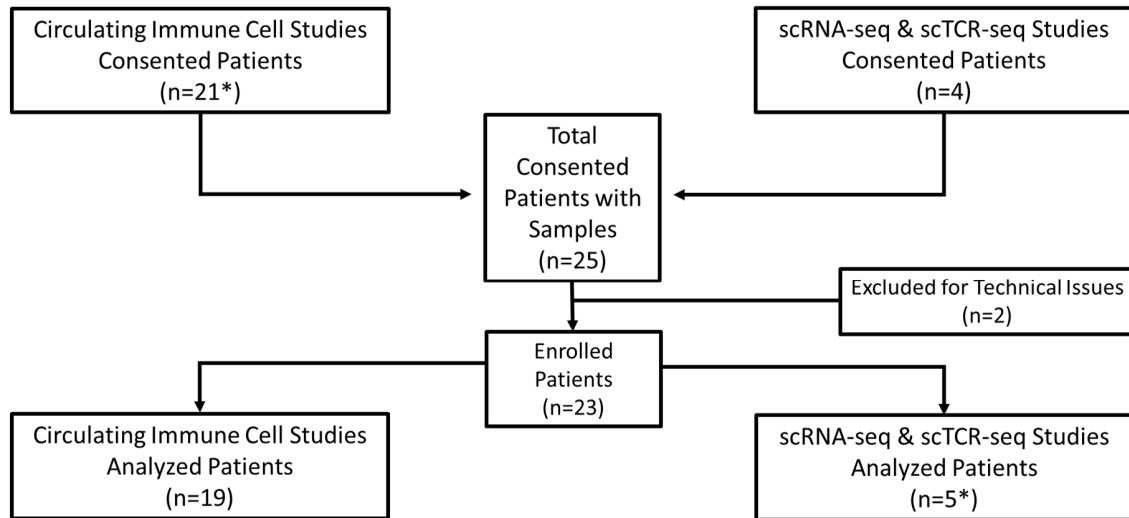

\*1 patient consented for both circulating immune cell and scRNA-seq & scTCR-seq studies

**Supplemental Figure S1.** Schematic of patients consented, enrolled and analyzed in the study.

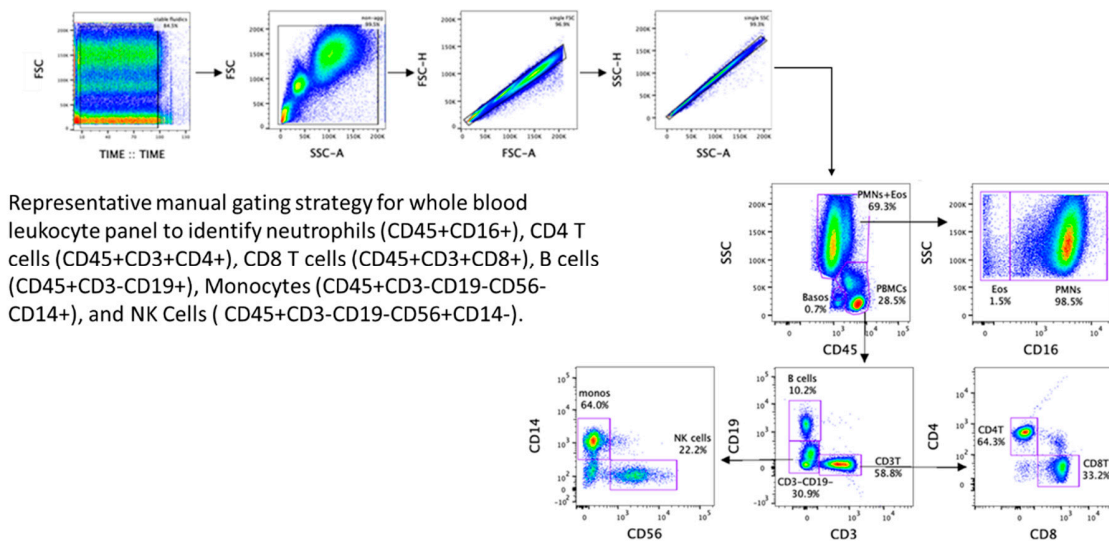

**Supplemental Figure S2.** Leukocyte manual gating strategy.

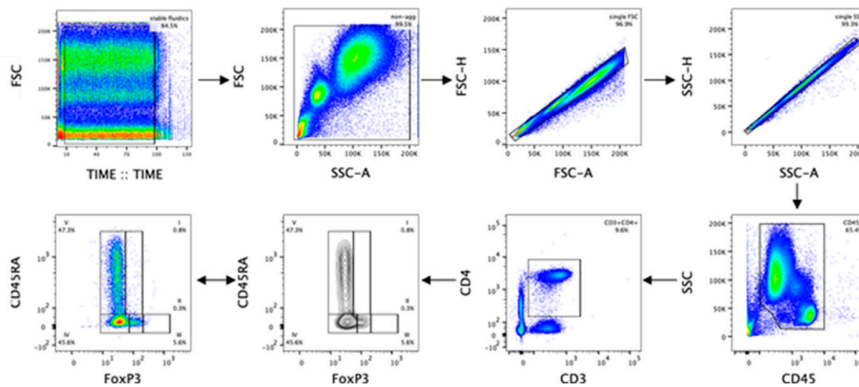

Supplemental Figure S3. Treg subset manual gating strategy.

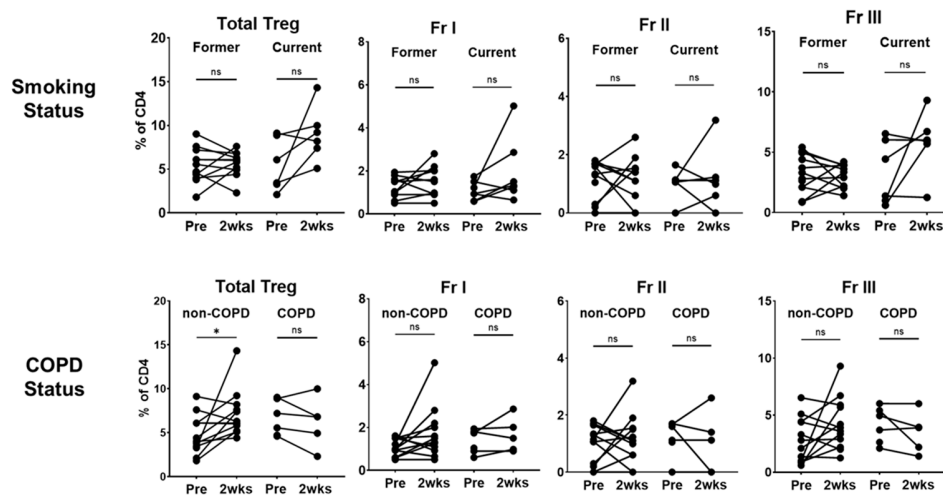

Supplemental Figure S4. Circulating treg proportions stratified by smoking & COPD.
